# Supplementary material for: Fabrication of a shape memory hydrogel based on imidazole–zinc ion coordination for potential cell-encapsulating tubular scaffold application
Source: Royal Society of Chemistry journal article supplement (doi:10.1039/c2sm26918j), 2012-10-15
Supplement: c2sm26918j.pdf [file c2sm26918j.pdf]

## Electronic supplementary information (ESI)

### Fabrication of a shape memory hydrogel based on imidazole-zinc ion coordination for potential cell-encapsulating tubular scaffold application

Wenjing Nan, Wei Wang, Han Gao, Wenguang Liu\*

*School of Materials Science and Engineering, Tianjin Key Laboratory of Composite and Functional Materials, Tianjin University, Tianjin 30072, PR China*

#### *Atomic absorption spectroscopy assay*

A slice of swollen hydrogel was placed in a centrifuge tube containing  $\text{Zn}^{2+}$  solution with a concentration of 1 mmol/L at room temperature. The solutions before and after adsorption were quantified for the amount of zinc ions by HITACHI 180-80 atomic absorption spectroscope (AAS). The  $\text{Zn}^{2+}$  adsorption capacity of the gels was calculated according to the equation given below:

$$q = \frac{(C_0 - C_e)V}{m}$$

Where  $c_0$  and  $c_e$  are the initial and final concentrations (mmol/L) of  $\text{Zn}^{2+}$  in the testing solution,  $V$  is the volume of the testing solution (L), and  $m$  is the weight of the wet gel (g).

---

\*To whom correspondence should be addressed  
E-mail: wgliu@tju.edu.cn

**Table S1.** Physical properties of hydrogels.

| Hydrogel | EWC(%)   | Tensile strength(KPa) | Elongation at break(%) | Young's Modulus(KPa) | R <sub>f</sub> (%) | R <sub>r</sub> (%) |
|----------|----------|-----------------------|------------------------|----------------------|--------------------|--------------------|
| PVI-AN-7 | 87.1±0.8 | 90±3                  | 19.03±1.10             | 470±40               | 100%               | 100%               |
| PVI-AN-5 | 80.3±0.4 | 109±8                 | 21.73±2.66             | 500±30               | 100%               | 100%               |
| PVI-AN-3 | 67.5±0.6 | 150±8                 | 20.07±4.97             | 600±40               | 100%               | 100%               |

Data are given as average±SD from three or more independent measurements.

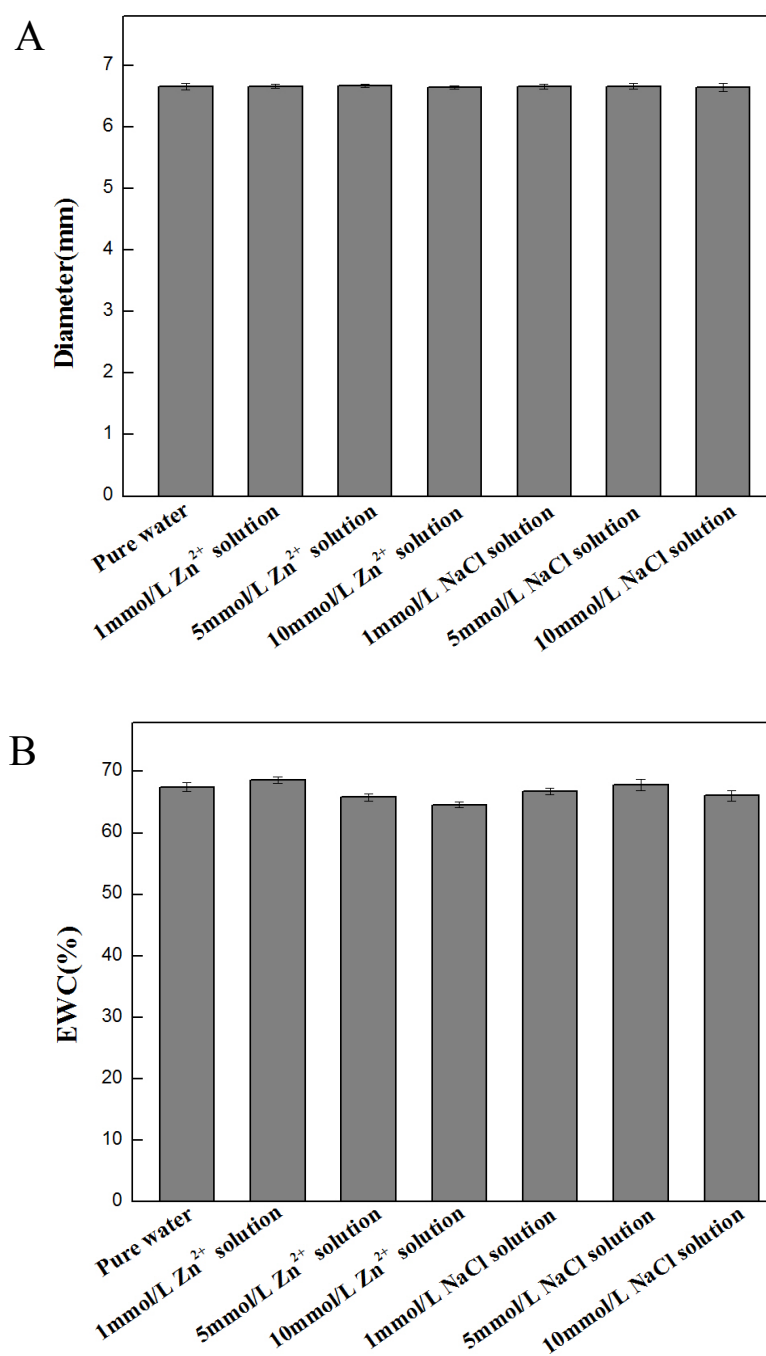

**Fig. S1.** Diameters (A) and EWCs (B) of PVI-AN hydrogel determined in different concentrations of zinc ion and NaCl solutions. NaCl solution serves as a control.

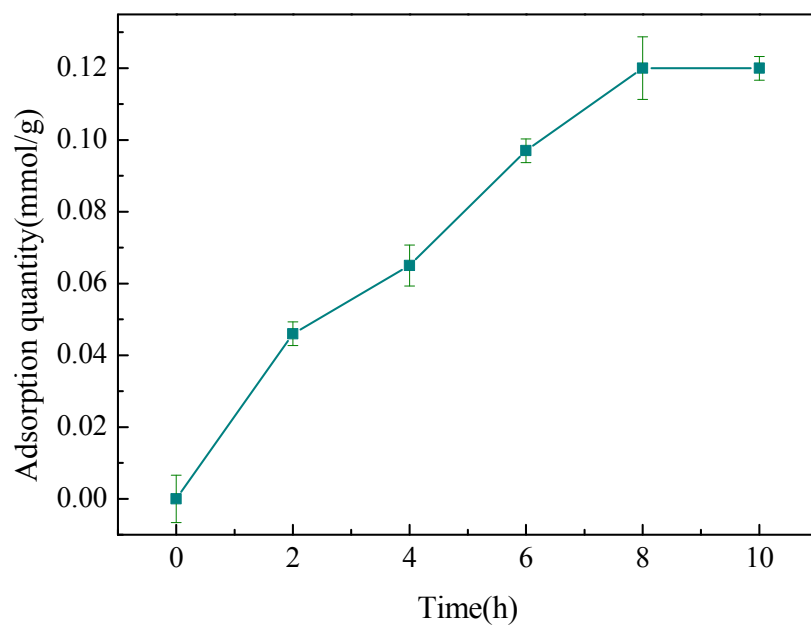

**Fig. S2.** Adsorption kinetics of zinc ions by hydrogel starting from 1 mmol/L ZnSO<sub>4</sub> solution.

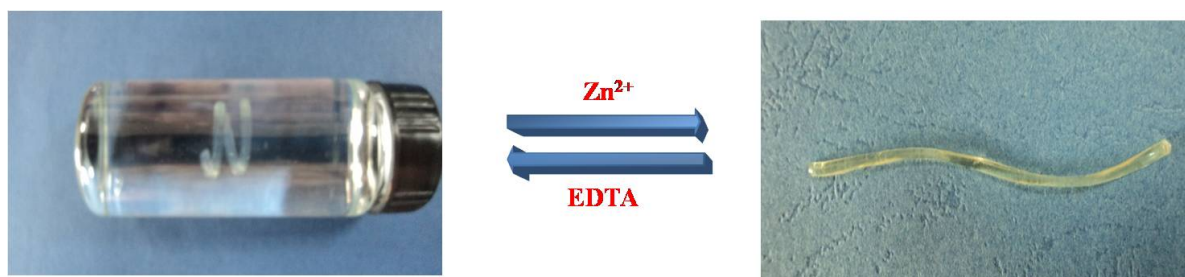

**Fig. S3.** Actual observation of shape memory effect of PVI-AN hydrogel. Original spiral shaped hydrogel was formed and stretched out to a strip shape, and then fixed in 10 mmol/l  $Zn^{2+}$  solution. The strip shape was transformed into original spiral shape after immersing in 50 mmol/L EDTA solution.

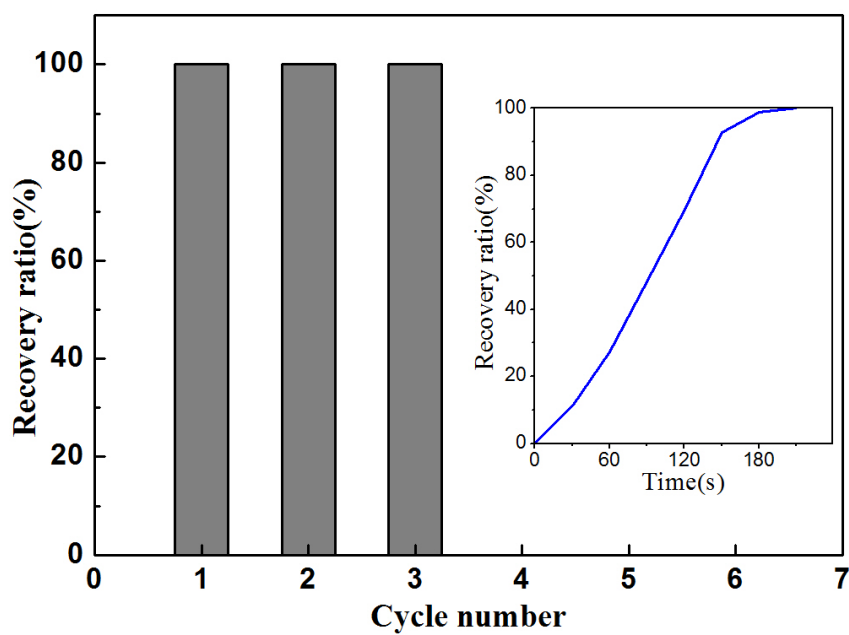

**Fig. S4.** Evaluation of shape memory cycle at 20°C under angle-controlled condition. Inset is the variation of recovery ratio as a function of time for one cycle.
